# Supplementary material for: A Vulnerability Assessment of Fish and Invertebrates to Climate Change on the Northeast U.S. Continental Shelf
Source: PubMed Central journal article supplement (PMC4739546; doi:10.1371/journal.pone.0146756), 2016-02-03

## S8 Supporting Information. Climate Vulnerability and Distribution Change Potential

When compared across all species, climate vulnerability was negatively correlated to potential for a distribution shift (spearman rank correlation  $-0.61$ ,  $p < 0.001$ ).

Figure S8. Climate vulnerability compared to potential for a distribution change. Size of symbol represents number of species; the number of species is also provided in the center of each symbol.

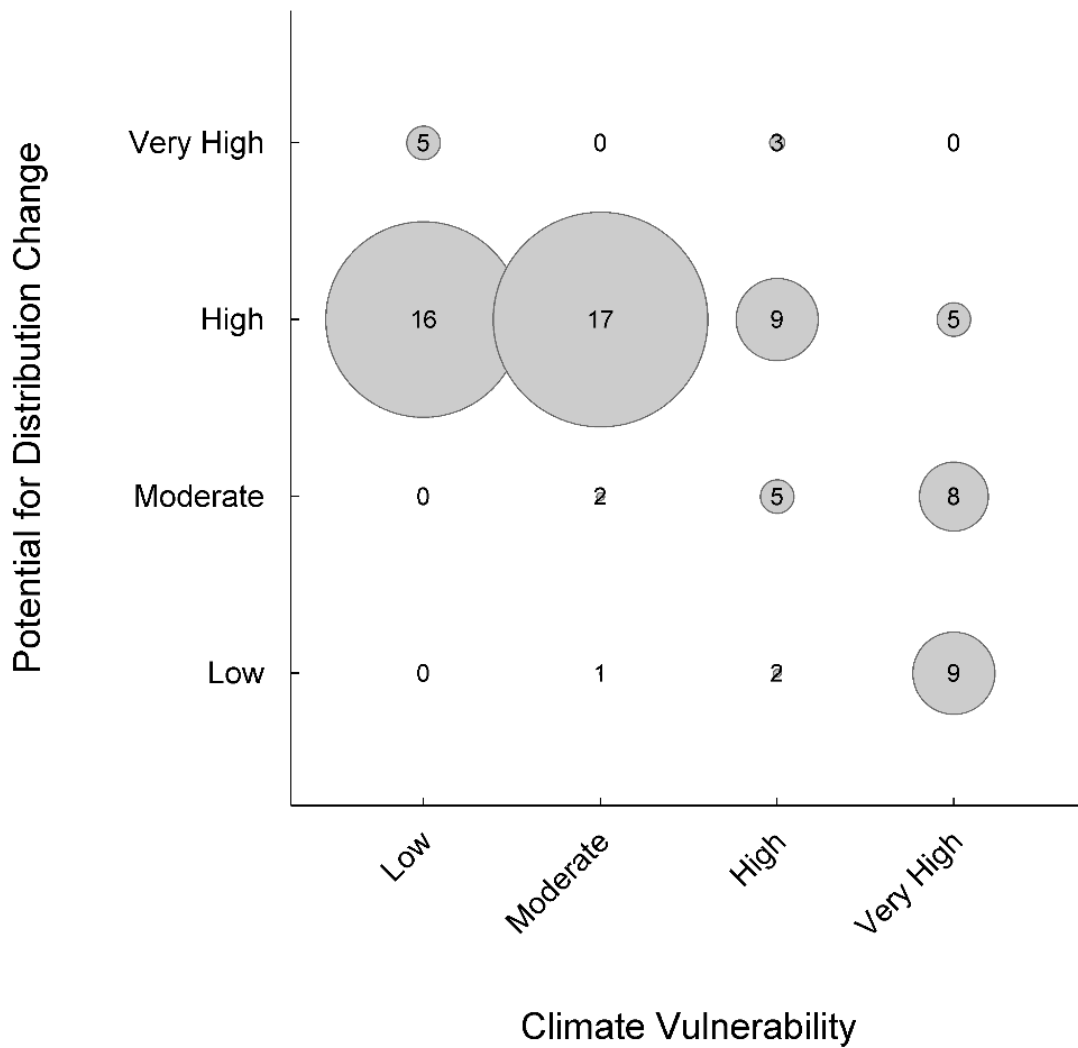

Supplement: pone.0146756.s010.pdf [file pone.0146756.s010.pdf]
