# Supplementary material for: A Vulnerability Assessment of Fish and Invertebrates to Climate Change on the Northeast U.S. Continental Shelf
Source: PubMed Central journal article supplement (PMC4739546; doi:10.1371/journal.pone.0146756), 2016-02-03
Supplement: pone.0146756.s011.pdf [file pone.0146756.s011.pdf]

## S9 Supporting Information. Climate Exposure Maps

Projected change in climate exposure factors: [ocean surface temperature](#), [surface air temperature](#), [ocean pH](#), [precipitation](#), and [ocean surface salinity](#). Historical stanom shows the mean difference (2006-2055 – 2005-1956) divided by the standard deviation over the historical period (1956-2005). Historical variance ratio shows the variance for the future period (2006-2055) divided by the variance of the historical period (1956-2005). These maps were compared with species distributions to determine climate exposure using the rubric presented in Table 3. Maps were obtained from [NOAA's Climate Change Web Portal](#).

# Ocean Surface Temperatures (Mean [top] and variance [bottom])

[return to first page](#)

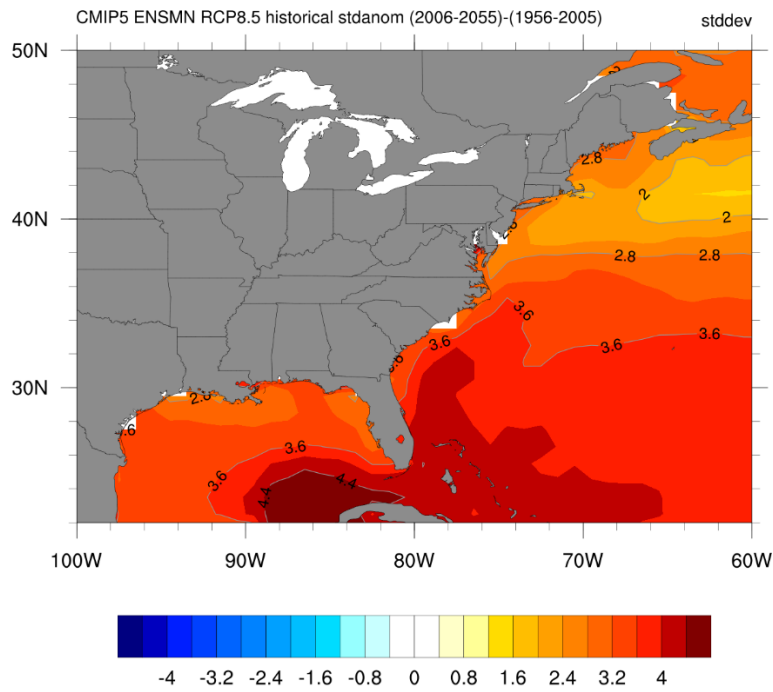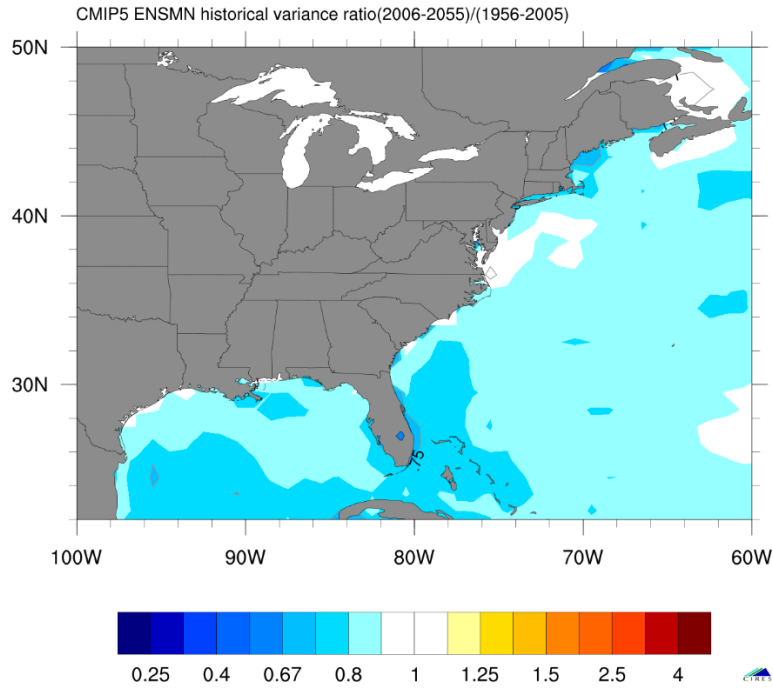

[return to first page](#)

# Surface Air Temperatures (Mean [top] and variance [bottom])

[return to first page](#)

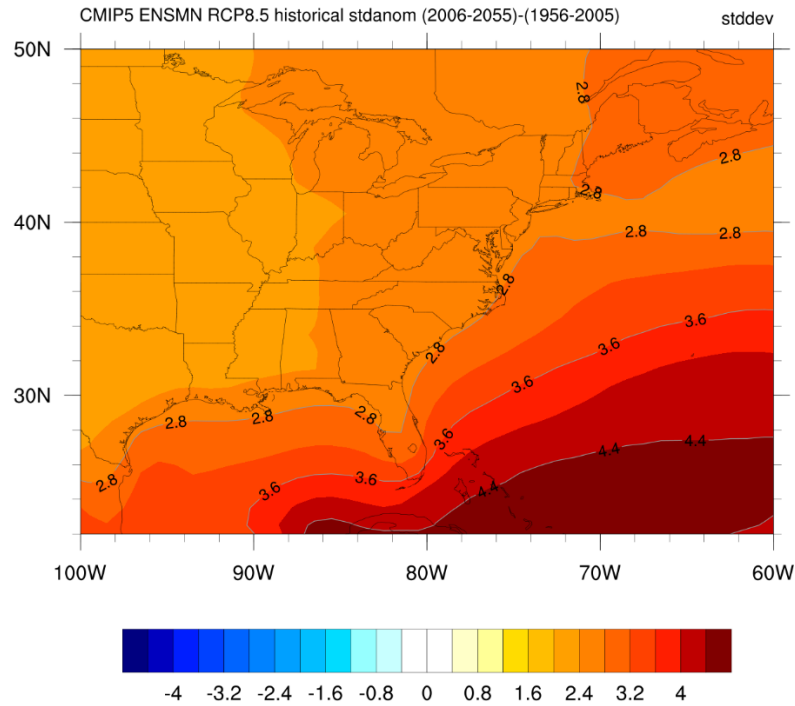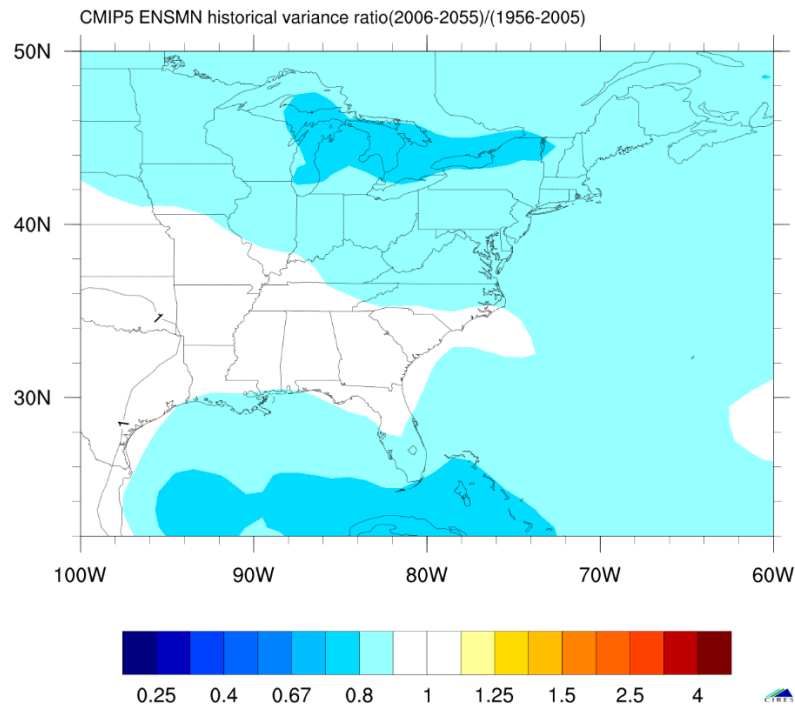

[return to first page](#)

# Ocean pH (Mean [top] and variance [bottom])

[return to first page](#)

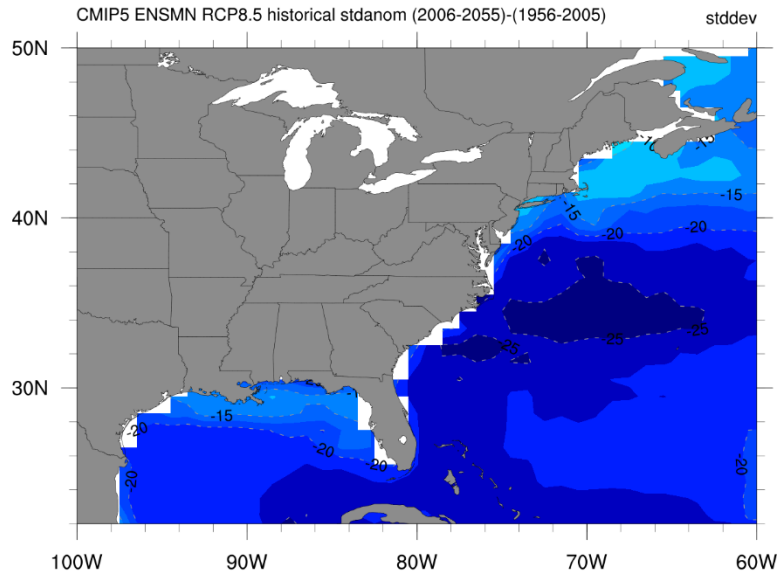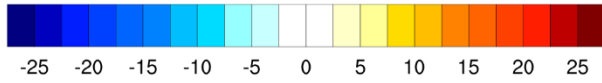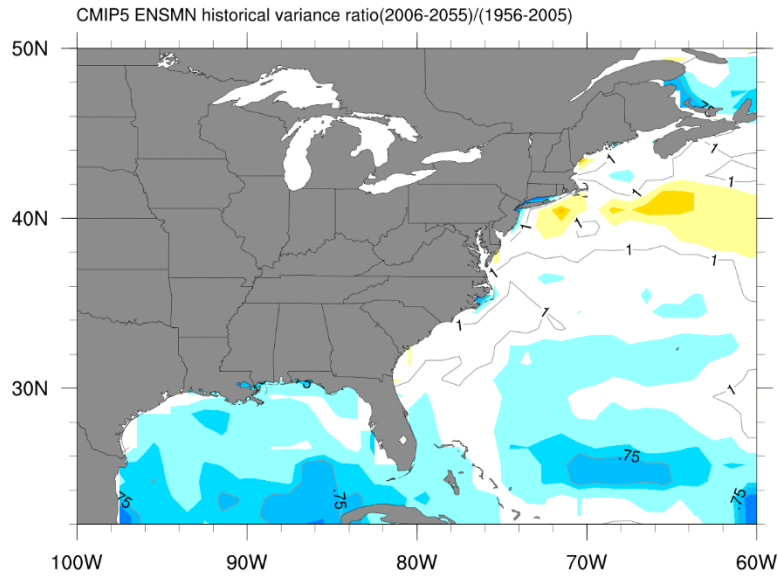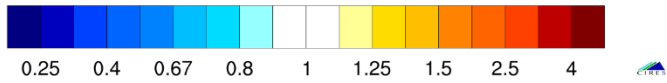

[return to first page](#)

# Precipitation (Mean [top] and variance [bottom])

[return to first page](#)

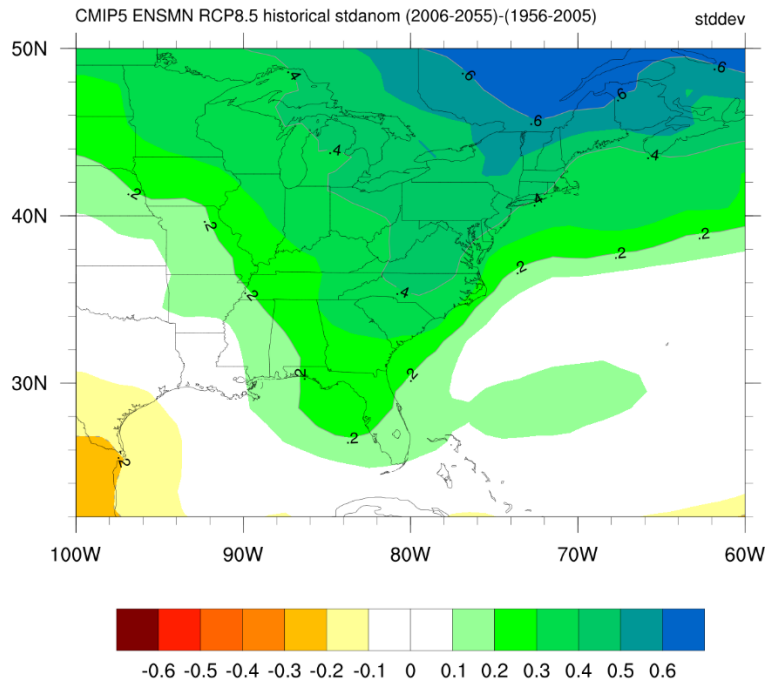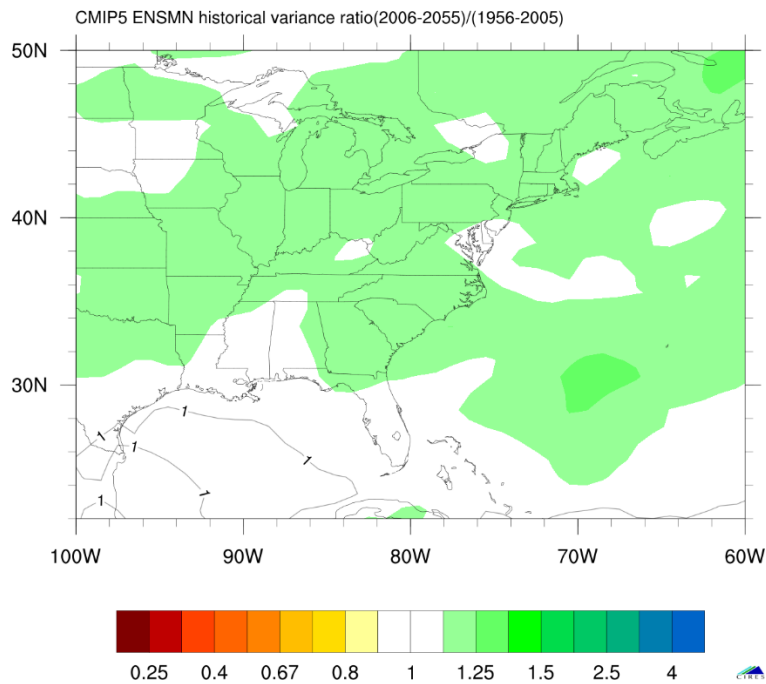

[return to first page](#)

# Ocean Surface Salinity (Mean [top] and variance [bottom])

[return to first page](#)

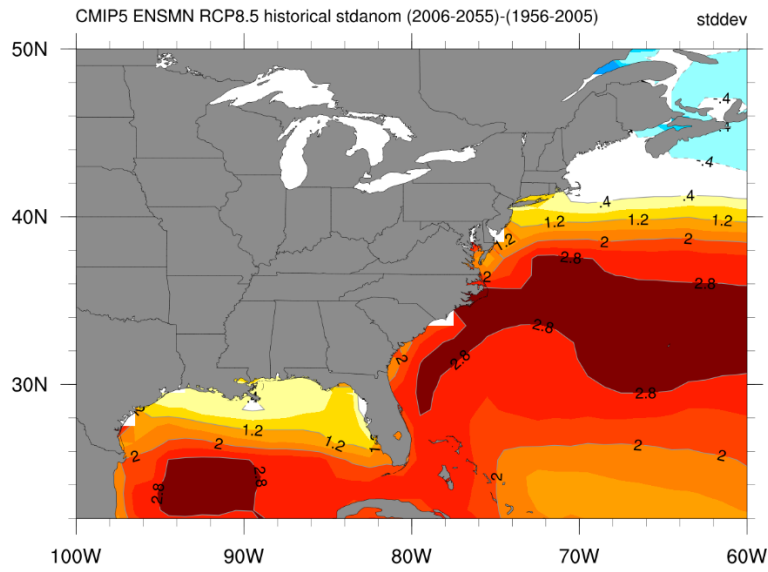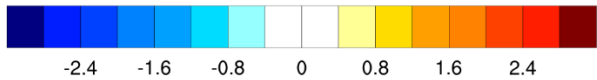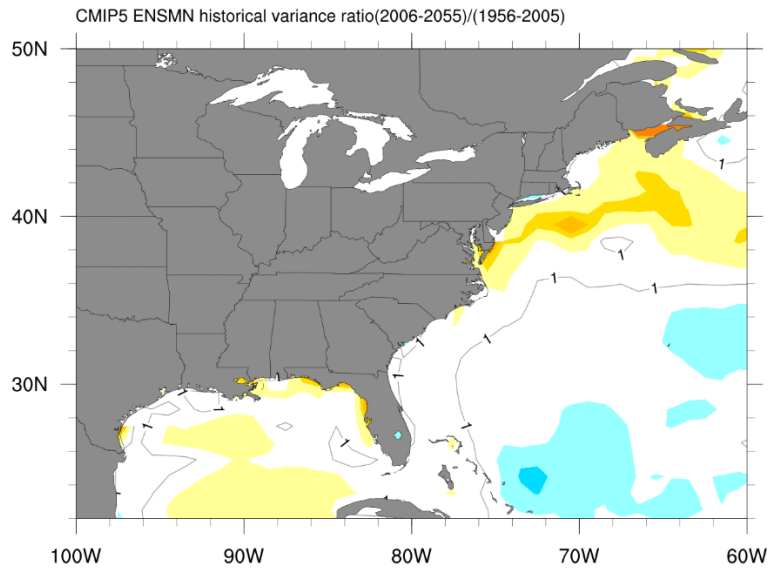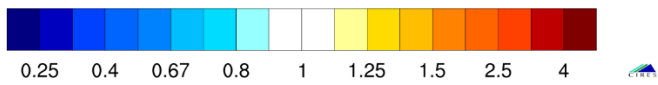

[return to first page](#)
