# Supplementary material for: A Vulnerability Assessment of Fish and Invertebrates to Climate Change on the Northeast U.S. Continental Shelf
Source: PLoS One. 2016 Feb 3;11(2):e0146756. doi: 10.1371/journal.pone.0146756 (PMC4739546; doi:10.1371/journal.pone.0146756)
Supplement: S5 Supporting Information — (PDF) [file pone.0146756.s007.pdf]

## **S5 Supporting Information. Assessment Results**

Two comma-delimited ascii files are included: S1 Dataset (Vulnerability Results) and S2 Dataset (Directional Effects Results).

### S1 Dataset (Vulnerability Results)

1969 rows

3 columns

Delimiter: ,

Header Rows: 1

Rows are:

Results for each species and attribute (82 x 24 = 1968 rows + 1 header row)

Columns are:

Species name - Common Name as listed in Table 1

Species functional group - as listed in Table 1

Attribute name - as listed in Table 2

Attribute category - as listed in Table 2: Climate Exposure or Biological Sensitivity

Low - total number of expert tallies received for that species and that attribute

Moderate - total number of expert tallies received for that species and that attribute

High - total number of expert tallies received for that species and that attribute

Very - total number of expert tallies received for that species and that attribute

Note: Sensitivity Attributes have a total of 25 tallies (5 experts, 5 tallies each), Climate Exposure Attributes has a total of 20 tallies (4 experts, 5 tallies)

S2 Dataset (Directional Effects Results)

83 rows

5 columns

Delimiter: ,

Header Rows: 1

Rows are:

    results for each species (82 rows + 1 header row)

Columns are

    Species name - Common Name as listed in Table 1

    Species functional group - as listed in Table 1

    Negative - total number of expert tallies received for that species

    Neutral - total number of expert tallies received for that species

    Positive - total number of expert tallies received for that species

Note: Directional Effect scores have a total of 12 tallies (3 experts, 4 tallies each)
